# Supplementary material for: Spectroscopic and Computational Observation of Glutamine Tautomerization in the Blue Light Sensing Using Flavin Domain Photoreaction
Source: PubMed Central journal article supplement (PMC9853863; doi:10.1021/jacs.2c10621), 2023-01-06
Supplement: ja2c10621_si_001.pdf [file ja2c10621_si_001.pdf]

Supporting information to

**Spectroscopic and Computational Observation of Glutamine  
Tautomerization in the Blue Light sensing Using Flavin Domain  
Photoreaction**

Yusaku Hontani<sup>1,¶,†</sup>, Jennifer Mehlhorn<sup>2,¶</sup>, Tatiana Domratcheva<sup>3,4</sup>, Sebastian Beck<sup>5</sup>, Miroslav Kloz<sup>1,6</sup>,  
Peter Hegemann<sup>2</sup>, Tilo Mathes<sup>1,2</sup> and John T.M. Kennis<sup>1\*</sup>

<sup>1</sup>Department of Physics and Astronomy, Vrije Universiteit Amsterdam, Amsterdam 1081 HV, De  
Boelelaan, The Netherlands

<sup>2</sup>Institut für Biologie, Experimentelle Biophysik, Humboldt Universität zu Berlin, Invalidenstrasse 42,  
D-10115 Berlin, Germany

<sup>3</sup>Department of Biomolecular Mechanisms, Max Planck Institute for Medical Research, 69120  
Heidelberg, Germany

<sup>4</sup>Lomonosov Moscow State University, Department of Chemistry, Moscow 119991, Russia

<sup>5</sup>Department of Chemistry, Humboldt-Universität zu Berlin, Brook-Taylor-Str. 2, 12489 Berlin,  
Germany

<sup>6</sup>ELI-Beamlines, Institute of Physics, Na Slovance 2, 182 21 Praha 8,  
Czech Republic

¶ these authors contributed equally

\*Corresponding author: j.t.m.kennis@vu.nl

†Current address: Brain Research Institute, University of Zurich, 8057 Zurich, Switzerland

## Supplemental Note

### *H<sub>2</sub>O/D<sub>2</sub>O effects in the FSRS spectra of DA and LA BLUF domains*

The bottom panel of **Fig. 2b** shows the EADS of the FSRS spectra of the DA BLUF domain in D<sub>2</sub>O. The overall pattern of vibrational bands is similar to that of the DA BLUF domain in H<sub>2</sub>O, with main bands at 1140, 1260, 1351, 1389, 1413, 1505, 1576 and 1610 cm<sup>-1</sup>. With respect to BLUF in H<sub>2</sub>O, the large band at 1204 cm<sup>-1</sup> has largely disappeared and a new band at 1140 cm<sup>-1</sup> has come up, while the band at 1258 cm<sup>-1</sup> in H<sub>2</sub>O has gained intensity in D<sub>2</sub>O, now peaking at 1260 cm<sup>-1</sup>. In addition, the band at 1576 cm<sup>-1</sup> has split in two, with bands at 1576 and 1610 cm<sup>-1</sup>. The remainder of the vibrational pattern is nearly the same as in H<sub>2</sub>O, involving only small shifts. A very similar pattern of band alterations was previously observed for FAD in aqueous solution, in H<sub>2</sub>O and D<sub>2</sub>O.<sup>1</sup>

According to the calculations for Model 2, the experimentally observed large band at 1204 cm<sup>-1</sup> observed in H<sub>2</sub>O that downshifts to 1140 cm<sup>-1</sup> and loses intensity in D<sub>2</sub>O, is a composite of modes at 1170 and 1190 cm<sup>-1</sup>, and mainly correspond to C<sub>9</sub>-H and C<sub>6</sub>-H in-plane bending modes, respectively (**Fig. S6**). Indeed, the calculated 1170 cm<sup>-1</sup> mode shifts down to 1133 – 1144 cm<sup>-1</sup> and loses intensity in D<sub>2</sub>O (Table S2), as observed in the experimental spectra. However, the calculated 1190 cm<sup>-1</sup> mode shifts up slightly to 1192 cm<sup>-1</sup> and maintains intensity in D<sub>2</sub>O, which does not agree with the experimental results. As mentioned earlier in this manuscript, the splitting of the experimental 1576 cm<sup>-1</sup> band into 1576 and 1610 cm<sup>-1</sup> is supported by the calculations, which indicate that it is composed of bands at 1545 and 1561 cm<sup>-1</sup>, which move apart in D<sub>2</sub>O (Table S2).

The other major difference between DA BLUF in H<sub>2</sub>O versus D<sub>2</sub>O is the intensity gain of the 1260 cm<sup>-1</sup> band in D<sub>2</sub>O as compared to H<sub>2</sub>O. In H<sub>2</sub>O, this mode likely corresponds to the calculated modes between 1236 - 1276 cm<sup>-1</sup>, which have rather low intensity. In the calculated D<sub>2</sub>O spectra, no obvious intensity gain is predicted in this spectral region (Table S2). We note that essentially the same intensity gain effect for a band at 1258 cm<sup>-1</sup> was observed for FAD in aqueous solution.<sup>1</sup> In that work, this intensity gain was assigned to mixing in of a N<sub>3</sub>-D wagging vibration at this wavenumber, on the basis of TD-B3LYP/TZVP normal-mode analysis.

**Fig. S3** shows the FSRS spectra for LA BLUF domains in H<sub>2</sub>O (upper panel) and D<sub>2</sub>O (lower panel). The differences between H<sub>2</sub>O and D<sub>2</sub>O are very similar to those observed for DA BLUF.

Likewise, the differences in calculated frequencies and intensities are very similar between model 2 and 3 in H<sub>2</sub>O and D<sub>2</sub>O, implying that the above considerations for DA BLUF apply to LA BLUF as well.

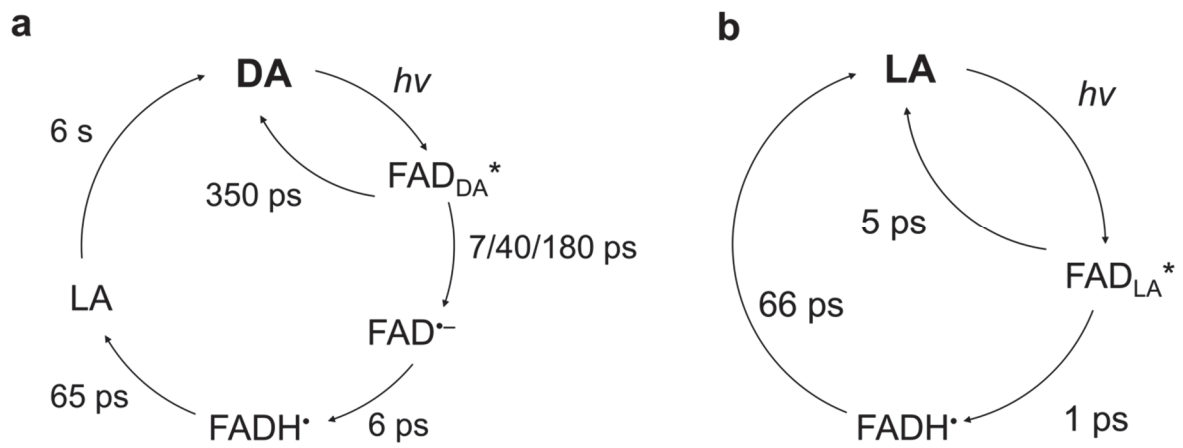

**Figure S1. Previously proposed reaction models of Slr1694 BLUF photoreceptor.** Photoreaction models of (a) dark-adapted (DA) state proposed by Gauden *et al.*<sup>2</sup> and (b) light-adapted (LA) state proposed by Mathes *et al.*<sup>3</sup>

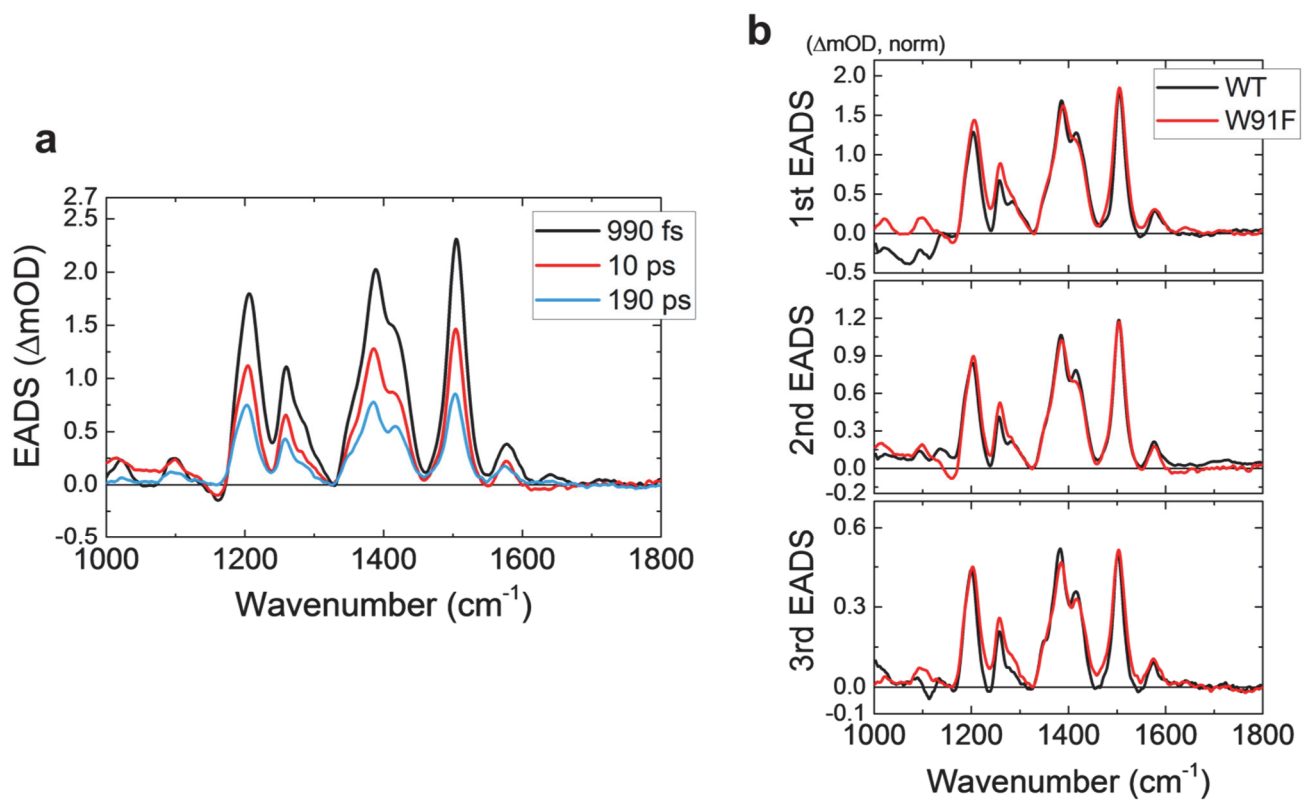

**Figure S2. Comparison of FSRS of the DA state between WT Slr1694 BLUF photoreceptor and its W91F mutant.** (a) EADS of the DA FSRS of the W91F mutant. (b) Comparison of normalized EADS of WT (black lines) and the W91F mutant (red lines) proteins. 1<sup>st</sup> (top), 2<sup>nd</sup> (middle) and 3<sup>rd</sup> (bottom) EADS are compared.

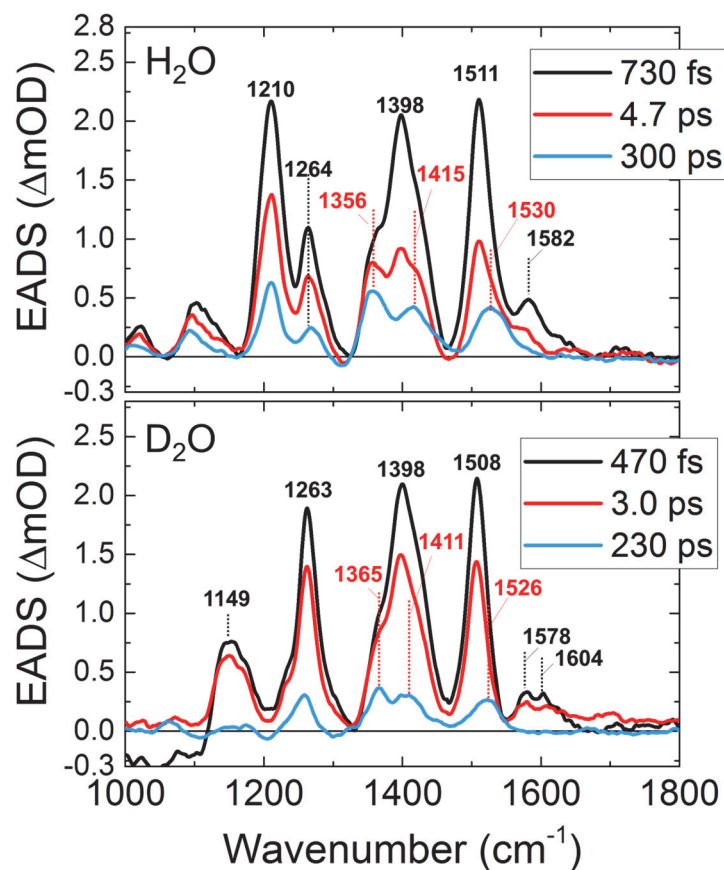

**Figure S3. EADS of FSRS of the LA state on the W91F mutant in  $H_2O$  (top) and  $D_2O$  (bottom).** The top figure is the same as the top panel of **Fig. 3b**. The differences in lifetimes between the samples in  $H_2O$  and  $D_2O$  are not considered to be significant.

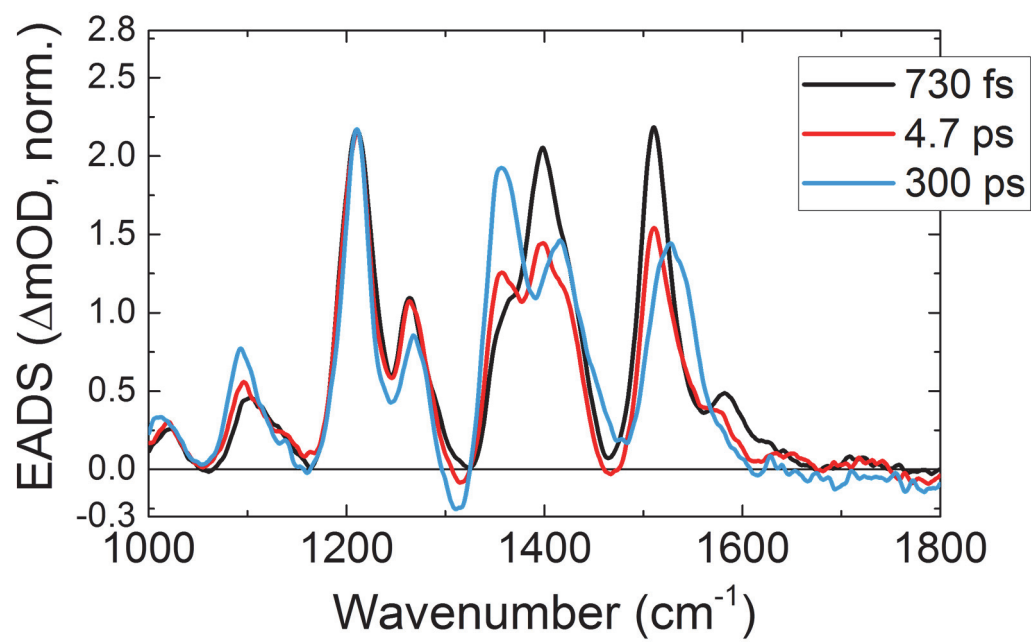

Figure S4. Normalized EADS of FSRS of the LA state on the W91F mutant in H<sub>2</sub>O.

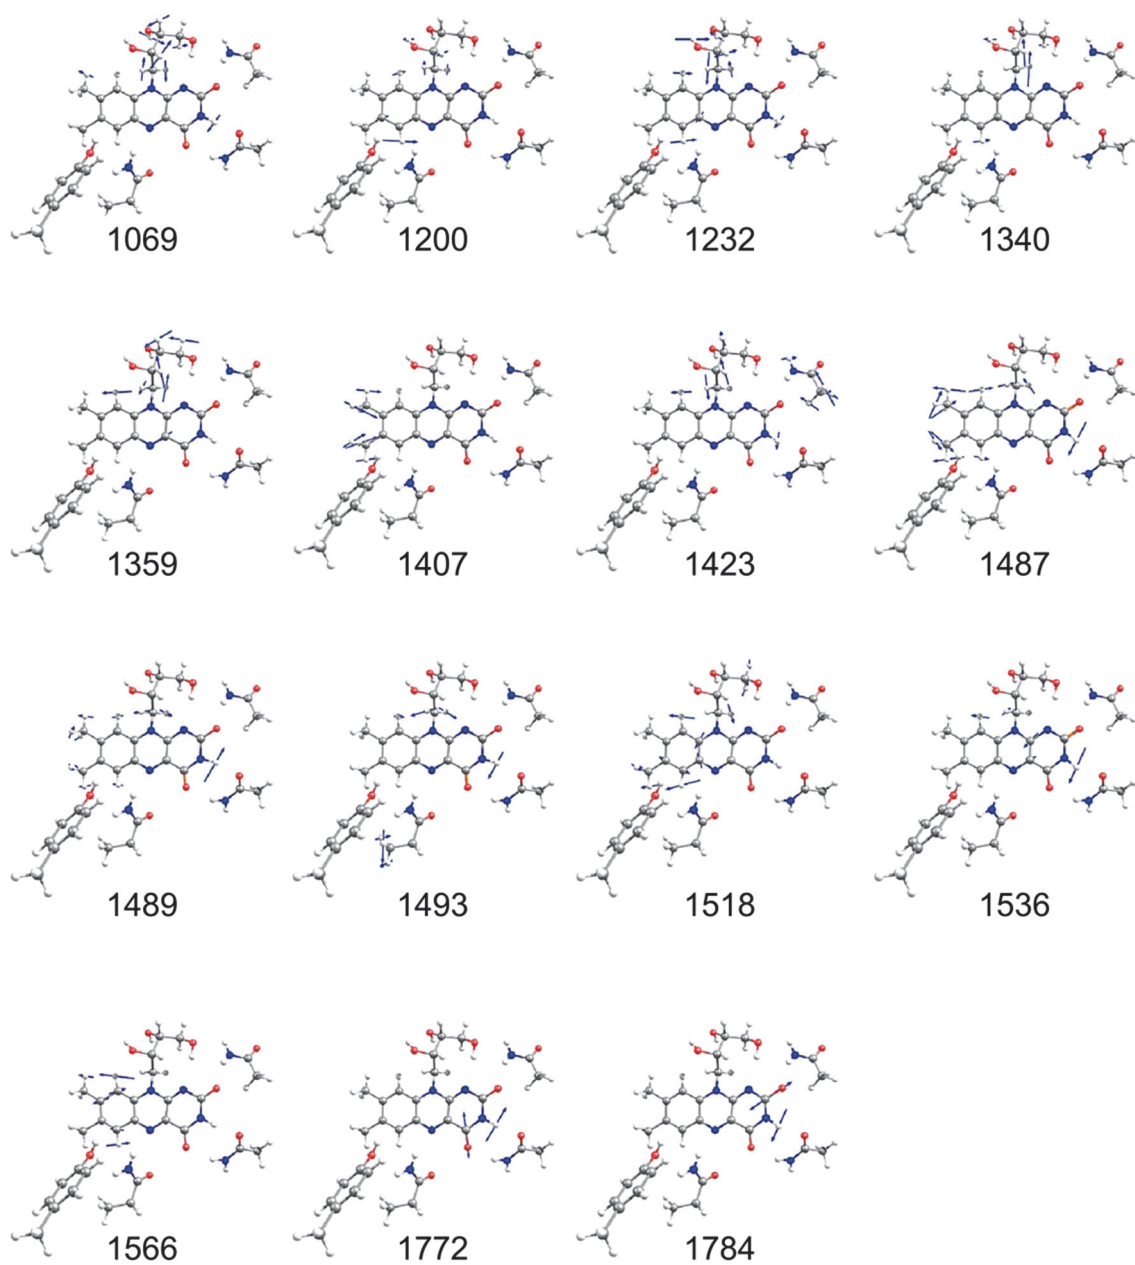

**Figure S5. Selected vibrational modes of computational model on Model 1 FAD configuration.**



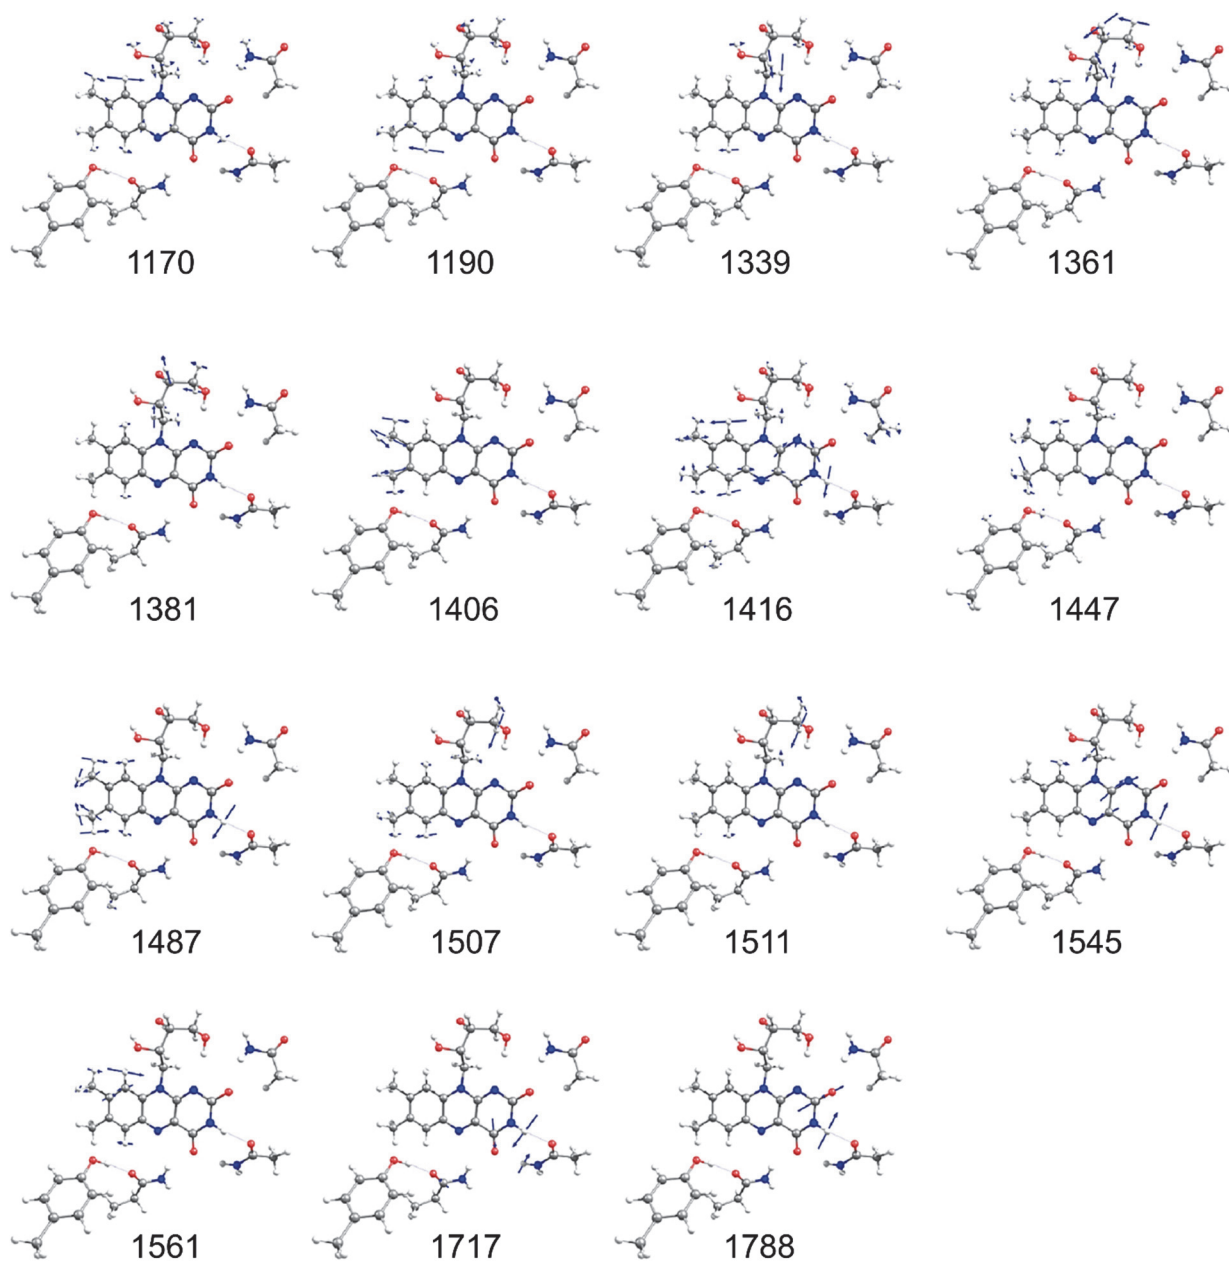

**Figure S6. Selected vibrational modes of computational model on Model 2 FAD configuration.**

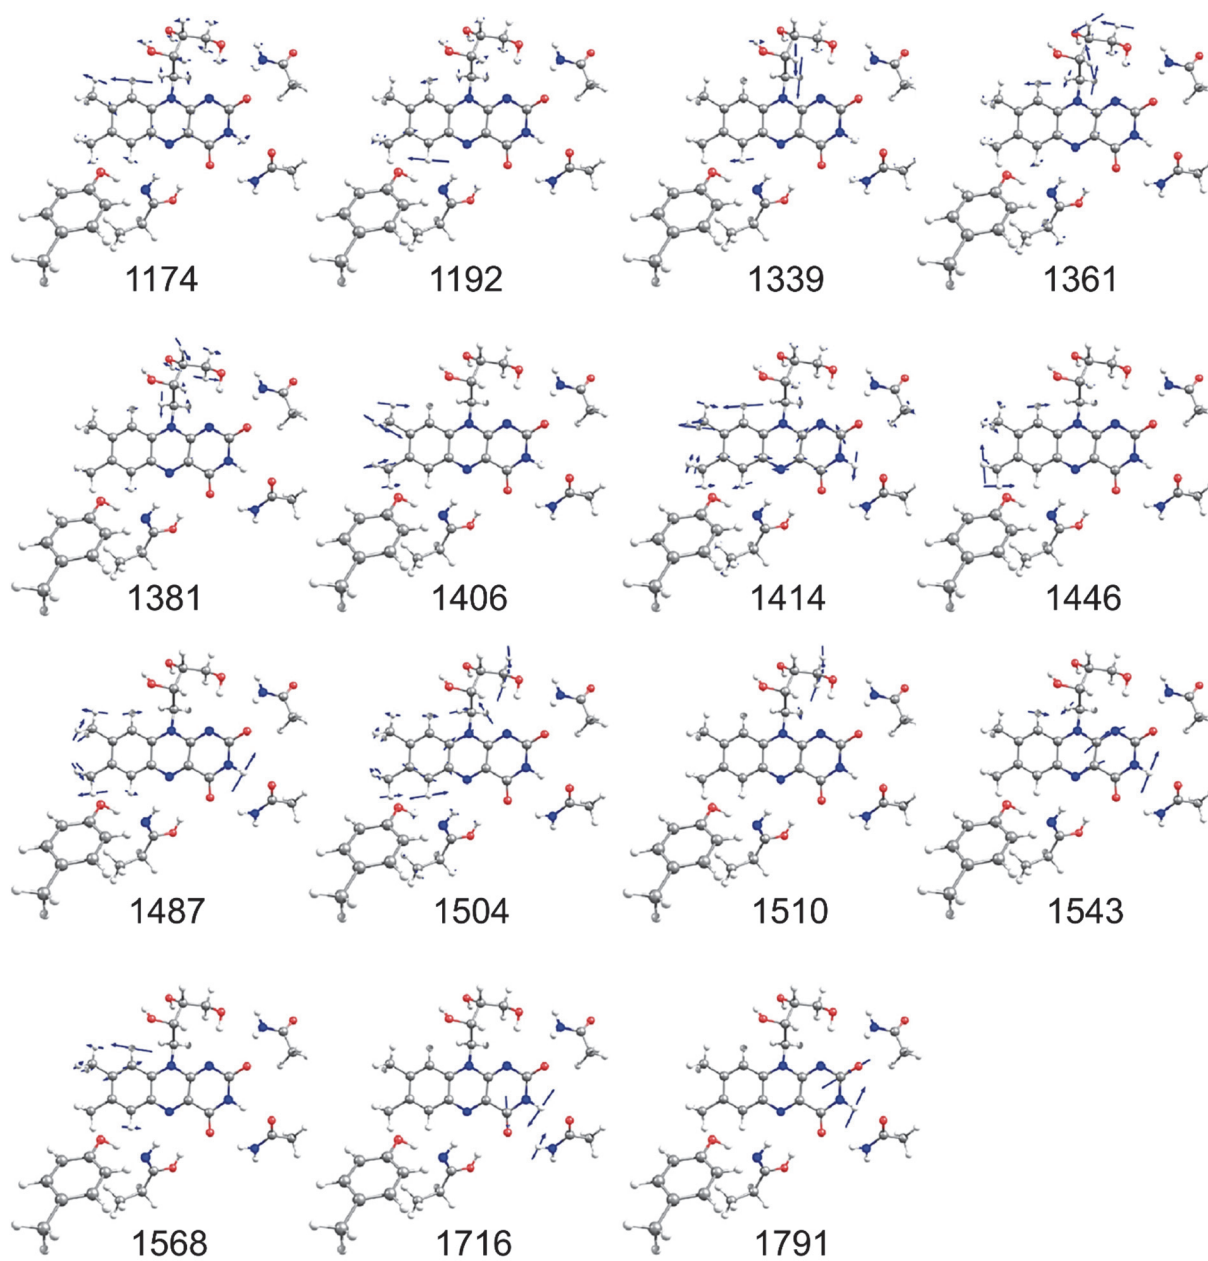

**Figure S7. Selected vibrational modes of computational model on Model 3 FAD configuration.**

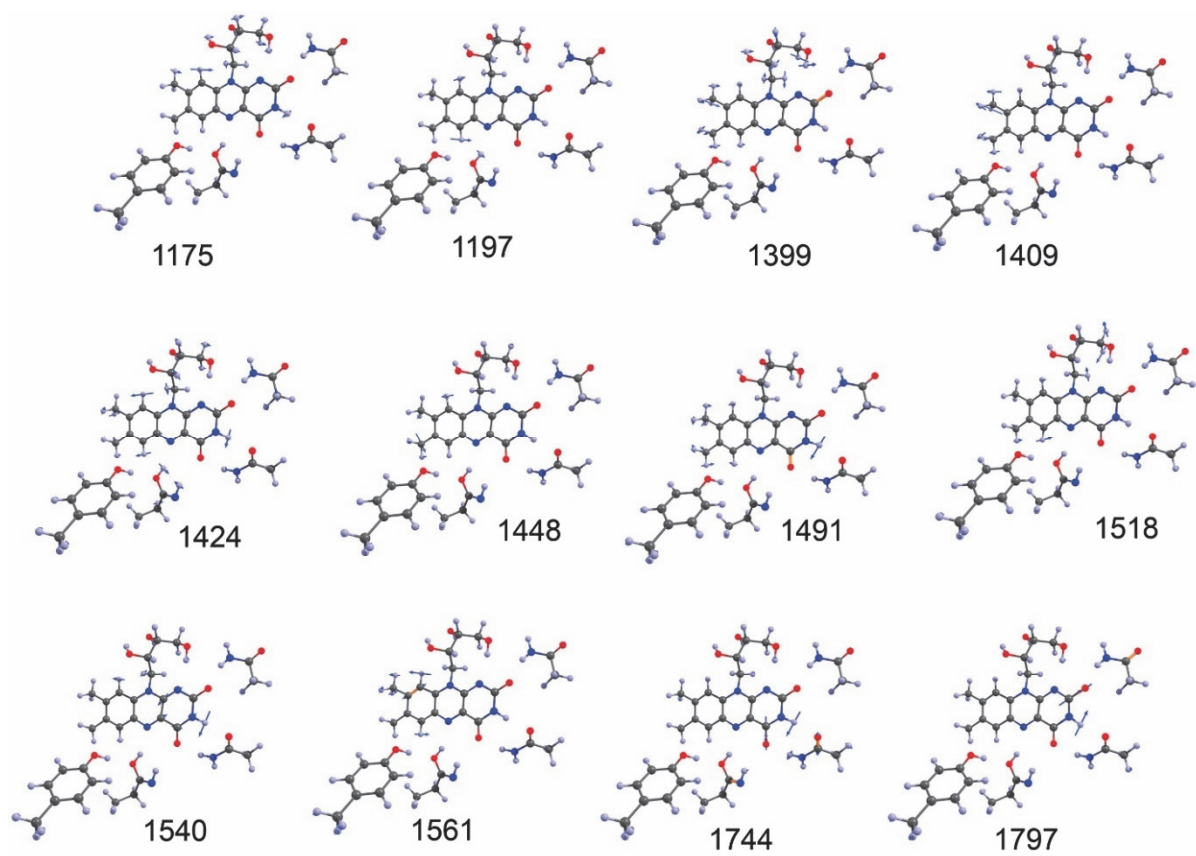

**Figure S8. Selected vibrational modes of computational model on Model 4 FAD configuration.**

**Table S1. Frequency and Raman activity of computational model on Model 1.**

| Model 1                 |                                 |                         |                                 |
|-------------------------|---------------------------------|-------------------------|---------------------------------|
| H <sub>2</sub> O        |                                 | D <sub>2</sub> O        |                                 |
| Freq., cm <sup>-1</sup> | Raman Act., Å <sup>4</sup> /AMU | Freq., cm <sup>-1</sup> | Raman Act., Å <sup>4</sup> /AMU |
|                         |                                 | 1056                    | 193                             |
| <b>1069</b>             | <b>124</b>                      |                         |                                 |
| 1089                    | 41                              |                         |                                 |
|                         |                                 | 1093                    | 13                              |
| 1104                    | 16                              |                         |                                 |
|                         |                                 | 1111                    | 10                              |
| 1114                    | 5                               |                         |                                 |
|                         |                                 | 1115                    | 19                              |
| 1125                    | 3                               |                         |                                 |
|                         |                                 | 1130                    | 41                              |
|                         |                                 | 1144                    | 13                              |
| 1146                    | 33                              |                         |                                 |
|                         |                                 | 1158                    | 6                               |
| 1169                    | 91                              |                         |                                 |
|                         |                                 | 1175                    | 6                               |
| 1183                    | 8                               |                         |                                 |
|                         |                                 | 1181                    | 14                              |
|                         |                                 | 1187                    | 25                              |
|                         |                                 | 1187                    | 15                              |
| <b>1200</b>             | <b>537</b>                      |                         |                                 |
| 0                       |                                 | 1205                    | 849                             |
| <b>1232</b>             | <b>539</b>                      |                         |                                 |
| 1245                    | 78                              | 1245                    | 375                             |
| 1247                    | 19                              |                         |                                 |
| 1263                    | 94                              |                         |                                 |
| 1277                    | 77                              | 1275                    | 80                              |
|                         |                                 | 1285                    | 12                              |
|                         |                                 | 1290                    | 20                              |
| 1292                    | 11                              |                         |                                 |
|                         |                                 | 1308                    | 67                              |
| 1314                    | 24                              |                         |                                 |
|                         |                                 | 1321                    | 71                              |
|                         |                                 | 1328                    | 102                             |
| <b>1340</b>             | <b>119</b>                      |                         |                                 |
|                         |                                 | 1347                    | 111                             |

| Model 1                 |                                 |                         |                                 |
|-------------------------|---------------------------------|-------------------------|---------------------------------|
| H <sub>2</sub> O        |                                 | D <sub>2</sub> O        |                                 |
| Freq., cm <sup>-1</sup> | Raman Act., Å <sup>4</sup> /AMU | Freq., cm <sup>-1</sup> | Raman Act., Å <sup>4</sup> /AMU |
| <b>1359</b>             | <b>497</b>                      | 1359                    | 460                             |
| 1367                    | 92                              | 1367                    | 4                               |
| 1382                    | 18                              | 1383                    | 75                              |
| 1387                    | 10                              |                         |                                 |
| 1396                    | 17                              |                         |                                 |
| 1397                    | 6                               | 1397                    | 11                              |
| <b>1407</b>             | <b>119</b>                      | 1407                    | 125                             |
|                         |                                 | 1417                    | 4                               |
| <b>1423</b>             | <b>113</b>                      | 1423                    | 80                              |
| 1426                    | 36                              | 1427                    | 78                              |
|                         |                                 | 1428                    | 53                              |
| 1430                    | 2                               |                         |                                 |
| 1439                    | 8                               |                         |                                 |
| 1450                    | 62                              | 1449                    | 45                              |
|                         |                                 | 1450                    | 46                              |
| 1453                    | 24                              | 1453                    | 26                              |
| 1454                    | 24                              | 1455                    | 29                              |
| 1456                    | 22                              |                         |                                 |
| 1472                    | 27                              | 1472                    | 56                              |
| 1473                    | 76                              | 1473                    | 53                              |
| <b>1487</b>             | <b>151</b>                      | 1487                    | 57                              |
| <b>1489</b>             | <b>107</b>                      |                         |                                 |
|                         |                                 | 1491                    | 22                              |
| <b>1493</b>             | <b>140</b>                      |                         |                                 |
| 1510                    | 54                              | 1509                    | 43                              |
| <b>1518</b>             | <b>881</b>                      | 1518                    | 774                             |
|                         |                                 | 1528                    | 1087                            |
| <b>1536</b>             | <b>675</b>                      |                         |                                 |
| <b>1566</b>             | <b>1520</b>                     | 1566                    | 1510                            |
|                         |                                 | 1719                    | 69                              |
|                         |                                 | 1753                    | 185                             |
| <b>1772</b>             | <b>190</b>                      |                         |                                 |
|                         |                                 | 1778                    | 407                             |
| <b>1784</b>             | <b>404</b>                      |                         |                                 |

**Table S2. Frequency and Raman activity of computational model on Model 2.**

| Model 2                 |                                 |                         |                                 |
|-------------------------|---------------------------------|-------------------------|---------------------------------|
| H <sub>2</sub> O        |                                 | D <sub>2</sub> O        |                                 |
| Freq., cm <sup>-1</sup> | Raman Act., Å <sup>4</sup> /AMU | Freq., cm <sup>-1</sup> | Raman Act., Å <sup>4</sup> /AMU |
|                         |                                 | 1133                    | 297                             |
|                         |                                 | 1144                    | 370                             |
|                         |                                 | 1158                    | 6                               |
| <b>1170</b>             | <b>1191</b>                     |                         |                                 |
|                         |                                 | 1175                    | 157                             |
|                         |                                 | 1181                    | 205                             |
| 1183                    | 121                             |                         |                                 |
|                         |                                 | 1187                    | 366                             |
| <b>1190</b>             | <b>2032</b>                     |                         |                                 |
|                         |                                 | 1192                    | 2249                            |
|                         |                                 |                         |                                 |
| 1236                    | 136                             |                         |                                 |
| 1241                    | 111                             |                         |                                 |
|                         |                                 |                         |                                 |
| 1247                    | 38                              |                         |                                 |
|                         |                                 | 1250                    | 85                              |
| 1266                    | 33                              |                         |                                 |
|                         |                                 | 1270                    | 264                             |
|                         |                                 |                         |                                 |
| 1276                    | 243                             |                         |                                 |
|                         |                                 | 1286                    | 35                              |
|                         |                                 | 1291                    | 7                               |
| 1292                    | 2                               |                         |                                 |
|                         |                                 | 1307                    | 106                             |
| 1316                    | 47                              |                         |                                 |
|                         |                                 | 1320                    | 67                              |
|                         |                                 | 1335                    | 128                             |
| <b>1339</b>             | <b>720</b>                      |                         |                                 |
|                         |                                 | 1346                    | 796                             |
| <b>1361</b>             | <b>710</b>                      | 1360                    | 780                             |
| 1368                    | 134                             | 1368                    | 3                               |
| <b>1381</b>             | <b>366</b>                      | 1382                    | 461                             |
| 1387                    | 152                             |                         |                                 |
| 1395                    | 208                             |                         |                                 |
| 1396                    | 253                             | 1396                    | 81                              |

| Model 2                 |                                 |                         |                                 |
|-------------------------|---------------------------------|-------------------------|---------------------------------|
| H <sub>2</sub> O        |                                 | D <sub>2</sub> O        |                                 |
| Freq., cm <sup>-1</sup> | Raman Act., Å <sup>4</sup> /AMU | Freq., cm <sup>-1</sup> | Raman Act., Å <sup>4</sup> /AMU |
| <b>1406</b>             | <b>398</b>                      | 1406                    | 435                             |
|                         |                                 |                         |                                 |
| <b>1416</b>             | <b>1285</b>                     | 1416                    | 395                             |
|                         |                                 | 1417                    | 597                             |
|                         |                                 | 1419                    | 739                             |
| 1425                    | 67                              | 1424                    | 218                             |
|                         |                                 | 1428                    | 56                              |
| 1430                    | 2                               |                         |                                 |
| 1438                    | 111                             |                         |                                 |
| <b>1447</b>             | <b>831</b>                      | 1447                    | 890                             |
| 1452                    | 145                             | 1452                    | 115                             |
|                         |                                 |                         |                                 |
|                         |                                 | 1456                    | 193                             |
| 1457                    | 132                             |                         |                                 |
|                         |                                 |                         |                                 |
| 1470                    | 16                              | 1470                    | 17                              |
| 1473                    | 134                             | 1472                    | 118                             |
| 1485                    | 153                             |                         |                                 |
| <b>1487</b>             | <b>1066</b>                     | 1486                    | 468                             |
|                         |                                 |                         |                                 |
| 1493                    | 42                              |                         |                                 |
|                         |                                 | 1495                    | 44                              |
|                         |                                 |                         |                                 |
| <b>1507</b>             | <b>1727</b>                     | 1506                    | 1859                            |
| <b>1511</b>             | <b>900</b>                      | 1510                    | 821                             |
|                         |                                 |                         |                                 |
|                         |                                 | 1540                    | 3421                            |
| <b>1545</b>             | <b>2868</b>                     |                         |                                 |
| <b>1561</b>             | <b>2235</b>                     | 1561                    | 2148                            |
|                         |                                 |                         |                                 |
|                         |                                 | 1696                    | 350                             |
| <b>1717</b>             | <b>439</b>                      |                         |                                 |
|                         |                                 | 1778                    | 1025                            |
| <b>1788</b>             | <b>835</b>                      |                         |                                 |

**Table S3. Frequency and Raman activity of computational model on Model 3.**

| Model 3                 |                                 |                         |                                 |
|-------------------------|---------------------------------|-------------------------|---------------------------------|
| H <sub>2</sub> O        |                                 | D <sub>2</sub> O        |                                 |
| Freq., cm <sup>-1</sup> | Raman Act., Å <sup>4</sup> /AMU | Freq., cm <sup>-1</sup> | Raman Act., Å <sup>4</sup> /AMU |
|                         |                                 | 1133                    | 225                             |
|                         |                                 | 1145                    | 357                             |
|                         |                                 | 1159                    | 9                               |
|                         |                                 |                         |                                 |
| <b>1174</b>             | <b>1139</b>                     | 1175                    | 141                             |
|                         |                                 | 1182                    | 85                              |
| 1183                    | 19                              |                         |                                 |
|                         |                                 | 1188                    | 434                             |
|                         |                                 |                         |                                 |
| <b>1192</b>             | <b>2129</b>                     |                         |                                 |
|                         |                                 | 1194                    | 2289                            |
| 1237                    | 99                              |                         |                                 |
|                         |                                 |                         |                                 |
| 1243                    | 99                              |                         |                                 |
| 1248                    | 45                              |                         |                                 |
|                         |                                 | 1251                    | 51                              |
| 1267                    | 34                              |                         |                                 |
|                         |                                 |                         |                                 |
|                         |                                 | 1272                    | 277                             |
| 1279                    | 261                             |                         |                                 |
|                         |                                 | 1286                    | 45                              |
|                         |                                 | 1291                    | 12                              |
| 1292                    | 2                               |                         |                                 |
|                         |                                 | 1308                    | 108                             |
| 1316                    | 51                              |                         |                                 |
|                         |                                 | 1320                    | 80                              |
|                         |                                 | 1336                    | 113                             |
| <b>1339</b>             | <b>824</b>                      |                         |                                 |
|                         |                                 | 1346                    | 958                             |
| <b>1361</b>             | <b>835</b>                      | 1360                    | 897                             |
| 1368                    | 140                             | 1368                    | 5                               |
| <b>1381</b>             | <b>478</b>                      | 1382                    | 592                             |
| 1386                    | 222                             |                         |                                 |
| 1395                    | 327                             |                         |                                 |
| 1396                    | 215                             | 1396                    | 64                              |

| Model 3                 |                                 |                         |                                 |
|-------------------------|---------------------------------|-------------------------|---------------------------------|
| H <sub>2</sub> O        |                                 | D <sub>2</sub> O        |                                 |
| Freq., cm <sup>-1</sup> | Raman Act., Å <sup>4</sup> /AMU | Freq., cm <sup>-1</sup> | Raman Act., Å <sup>4</sup> /AMU |
| <b>1406</b>             | <b>632</b>                      | 1406                    | 752                             |
| <b>1414</b>             | <b>1063</b>                     | 1414                    | 1399                            |
|                         |                                 | 1416                    | 202                             |
|                         |                                 |                         |                                 |
| 1425                    | 57                              | 1424                    | 137                             |
|                         |                                 | 1428                    | 52                              |
| 1430                    | 6                               |                         |                                 |
| 1438                    | 114                             |                         |                                 |
| <b>1446</b>             | <b>1008</b>                     | 1446                    | 987                             |
| 1451                    | 260                             | 1451                    | 250                             |
|                         |                                 | 1454                    | 210                             |
| 1455                    | 83                              | 1455                    | 11                              |
|                         |                                 |                         |                                 |
| 1468                    | 94                              | 1468                    | 102                             |
| 1470                    | 48                              | 1470                    | 29                              |
|                         |                                 |                         |                                 |
| 1485                    | 43                              |                         |                                 |
| <b>1487</b>             | <b>1467</b>                     | 1486                    | 818                             |
|                         |                                 | 1491                    | 47                              |
| 1492                    | 187                             |                         |                                 |
|                         |                                 |                         |                                 |
| <b>1504</b>             | <b>1968</b>                     | 1504                    | 2210                            |
|                         |                                 |                         |                                 |
| <b>1510</b>             | <b>347</b>                      | 1510                    | 307                             |
|                         |                                 | 1535                    | 265                             |
|                         |                                 | 1538                    | 4266                            |
| <b>1543</b>             | <b>3750</b>                     |                         |                                 |
|                         |                                 |                         |                                 |
| <b>1568</b>             | <b>1604</b>                     | 1568                    | 1569                            |
|                         |                                 | 1695                    | 327                             |
| <b>1716</b>             | <b>401</b>                      |                         |                                 |
|                         |                                 | 1780                    | 1092                            |
| <b>1791</b>             | <b>896</b>                      |                         |                                 |

**Table S4. Frequency and Raman activity of computational model on Model 4.**

| Model 4                 |                                 |                         |                                 |
|-------------------------|---------------------------------|-------------------------|---------------------------------|
| H <sub>2</sub> O        |                                 | D <sub>2</sub> O        |                                 |
| Freq., cm <sup>-1</sup> | Raman Act., Å <sup>4</sup> /AMU | Freq., cm <sup>-1</sup> | Raman Act., Å <sup>4</sup> /AMU |
|                         |                                 | 1147                    | 544                             |
| 1149                    | 7                               |                         |                                 |
| 1152                    | 16                              |                         |                                 |
|                         |                                 | 1161                    | 30                              |
| <b>1175</b>             | <b>1552</b>                     |                         |                                 |
|                         |                                 | 1177                    | 9                               |
|                         |                                 | 1196                    | 262                             |
| <b>1197</b>             | <b>1652</b>                     |                         |                                 |
|                         |                                 | 1203                    | 2591                            |
| <b>1237</b>             | <b>315</b>                      |                         |                                 |
|                         |                                 | 1249                    | 31                              |
| 1260                    | 259                             |                         |                                 |
| 1264                    | 26                              |                         |                                 |
|                         |                                 | 1280                    | 312                             |
| 1282                    | 60                              |                         |                                 |
| 1285                    | 289                             |                         |                                 |
|                         |                                 | 1291                    | 44                              |
|                         |                                 | 1299                    | 100                             |
| 1301                    | 21                              |                         |                                 |
|                         |                                 | 1308                    | 166                             |
| 1316                    | 84                              |                         |                                 |
|                         |                                 | 1321                    | 48                              |
|                         |                                 | 1338                    | 173                             |
| 1341                    | 371                             |                         |                                 |
| 1344                    | 78                              |                         |                                 |
|                         |                                 | 1347                    | 704                             |
| <b>1359</b>             | <b>838</b>                      |                         |                                 |
|                         |                                 | 1361                    | 510                             |
|                         |                                 | 1367                    | 7                               |
| 1369                    | 42                              |                         |                                 |
| 1379                    | 184                             |                         |                                 |
|                         |                                 | 1383                    | 289                             |
| 1389                    | 187                             |                         |                                 |
| 1397                    | 17                              |                         |                                 |
|                         |                                 | 1398                    | 54                              |
| 1399                    | 232                             |                         |                                 |
| 1409                    | 306                             | 1409                    | 319                             |
|                         |                                 | 1419                    | 174                             |

| Model 4                 |                                 |                         |                                 |
|-------------------------|---------------------------------|-------------------------|---------------------------------|
| H <sub>2</sub> O        |                                 | D <sub>2</sub> O        |                                 |
| Freq., cm <sup>-1</sup> | Raman Act., Å <sup>4</sup> /AMU | Freq., cm <sup>-1</sup> | Raman Act., Å <sup>4</sup> /AMU |
| <b>1424</b>             | <b>793</b>                      |                         |                                 |
|                         |                                 | 1426                    | 422                             |
|                         |                                 | 1427                    | 135                             |
| 1428                    | 131                             | 1428                    | 272                             |
|                         |                                 | 1431                    | 590                             |
| 1432                    | 28                              |                         |                                 |
| 1442                    | 117                             |                         |                                 |
| <b>1448</b>             | <b>951</b>                      | 1448                    | 1013                            |
|                         |                                 | 1454                    | 181                             |
| 1454                    | 228                             |                         |                                 |
|                         |                                 | 1459                    | 218                             |
| 1461                    | 129                             |                         |                                 |
| 1471                    | 21                              | 1471                    | 20                              |
| 1473                    | 31                              | 1473                    | 31                              |
|                         |                                 | 1478                    | 135                             |
| 1479                    | 70                              |                         |                                 |
| 1479                    | 122                             |                         |                                 |
| 1489                    | 85                              |                         |                                 |
|                         |                                 | 1490                    | 680                             |
| <b>1491</b>             | <b>1579</b>                     |                         |                                 |
|                         |                                 | 1496                    | 183                             |
| 1497                    | 33                              |                         |                                 |
|                         |                                 | 1513                    | 589                             |
| <b>1514</b>             | <b>601</b>                      |                         |                                 |
|                         |                                 | 1517                    | 971                             |
| <b>1518</b>             | <b>1570</b>                     |                         |                                 |
|                         |                                 | 1533                    | 1069                            |
|                         |                                 | 1535                    | 3694                            |
| <b>1540</b>             | <b>3352</b>                     |                         |                                 |
|                         |                                 | 1560                    | 2681                            |
| <b>1561</b>             | <b>2813</b>                     |                         |                                 |
|                         |                                 | 1695                    | 191                             |
| 1718                    | 172                             |                         |                                 |
|                         |                                 | 1729                    | 116                             |
| 1744                    | 231                             |                         |                                 |
|                         |                                 | 1767                    | 171                             |
|                         |                                 | 1786                    | 901                             |
| <b>1797</b>             | <b>773</b>                      |                         |                                 |

**Table S5**

| Primer        | Sequence 5'-3'                                                                         | Manufacturer |
|---------------|----------------------------------------------------------------------------------------|--------------|
| DgltB-<br>fwd | TAACCGATGC GAAAAGGACA ACAAGGGGGC<br>GAATGCGAGG CGCGCGTATG <u>gTgTAggCTg gAgCTgCTTC</u> | Sigma        |
| DgltB-<br>rev | TAAACATTCTGACTCATTGTTGCTACCCCTTACTGCGCCT<br>GCACGCGCAA <u>CggCTgACAT gggAATTAgC</u>    | Sigma        |
| DybaS<br>-rev | ACCGTTATTA CCTTCCGTGT TCATCATGAT<br>CAGCCCTTAA ACACGTTATA <u>CggCTgACAT gggAATTAgC</u> | Sigma        |
| DybaS<br>-fwd | GGGGTGAGGA ATTACCTCCC GCATCTATAA<br>AAAGGAGTTA ACAAAGATG <u>gTgTAggCTg gAgCTgCTTC</u>  | Sigma        |
| DyneH<br>-rev | CTGATATACT CGCAGGTCTT TTCAGACCTG<br>CGGTCCAGGA GTAGAAAGTG <u>CggCTgACAT gggAATTAgC</u> | Sigma        |
| DyneH<br>-fwd | ACGCGCGAAG AGTGGATCGA GAGACTGCAT<br>TAATAAACCG AACGCCCTAA <u>gTgTAggCTg gAgCTgCTTC</u> | Sigma        |
| HgltB-<br>rev | GGAAAACGGCTCGTAAATTTTC                                                                 | Invitrogen   |
| HgltB-<br>fwd | GCTTGCCATTTGACCTGTATC                                                                  | Invitrogen   |
| HyneH<br>-rev | GGAAGTGGCTAATGATAGTG                                                                   | Invitrogen   |
| HyneH<br>-fwd | CGGAATGTTATGCCACTTAG                                                                   | Invitrogen   |
| HybaS<br>-rev | CATAACCGGAAAACATCGCC                                                                   | Invitrogen   |
| HybaS<br>-fwd | GTAAACCTTCCAGCAAGGG                                                                    | Invitrogen   |



## References

1. Weigel, A.; Dobryakov, A.; Klaumunzer, B.; Sajadi, M.; Saalfrank, P.; Ernsting, N. P., Femtosecond stimulated Raman spectroscopy of flavin after optical excitation. *J Phys Chem B* **2011**, *115* (13), 3656-80.
2. Gauden, M.; van Stokkum, I. H.; Key, J. M.; Luhrs, D.; van Grondelle, R.; Hegemann, P.; Kennis, J. T., Hydrogen-bond switching through a radical pair mechanism in a flavin-binding photoreceptor. *Proc Natl Acad Sci U S A* **2006**, *103* (29), 10895-900.
3. Mathes, T.; Zhu, J.; van Stokkum, I. H. M.; Groot, M. L.; Hegemann, P.; Kennis, J. T. M., Hydrogen Bond Switching among Flavin and Amino Acids Determines the Nature of Proton-Coupled Electron Transfer in BLUF Photoreceptors. *The Journal of Physical Chemistry Letters* **2012**, *3* (2), 203-208.
